# Supplementary material for: The transcriptome of the invasive eel swimbladder nematode parasite Anguillicola crassus
Source: PubMed Central journal article supplement (PMC3630068; doi:10.1186/1471-2164-14-87), 2013-02-08

a) Biological process enriched for  $dn/ds > 0.5$

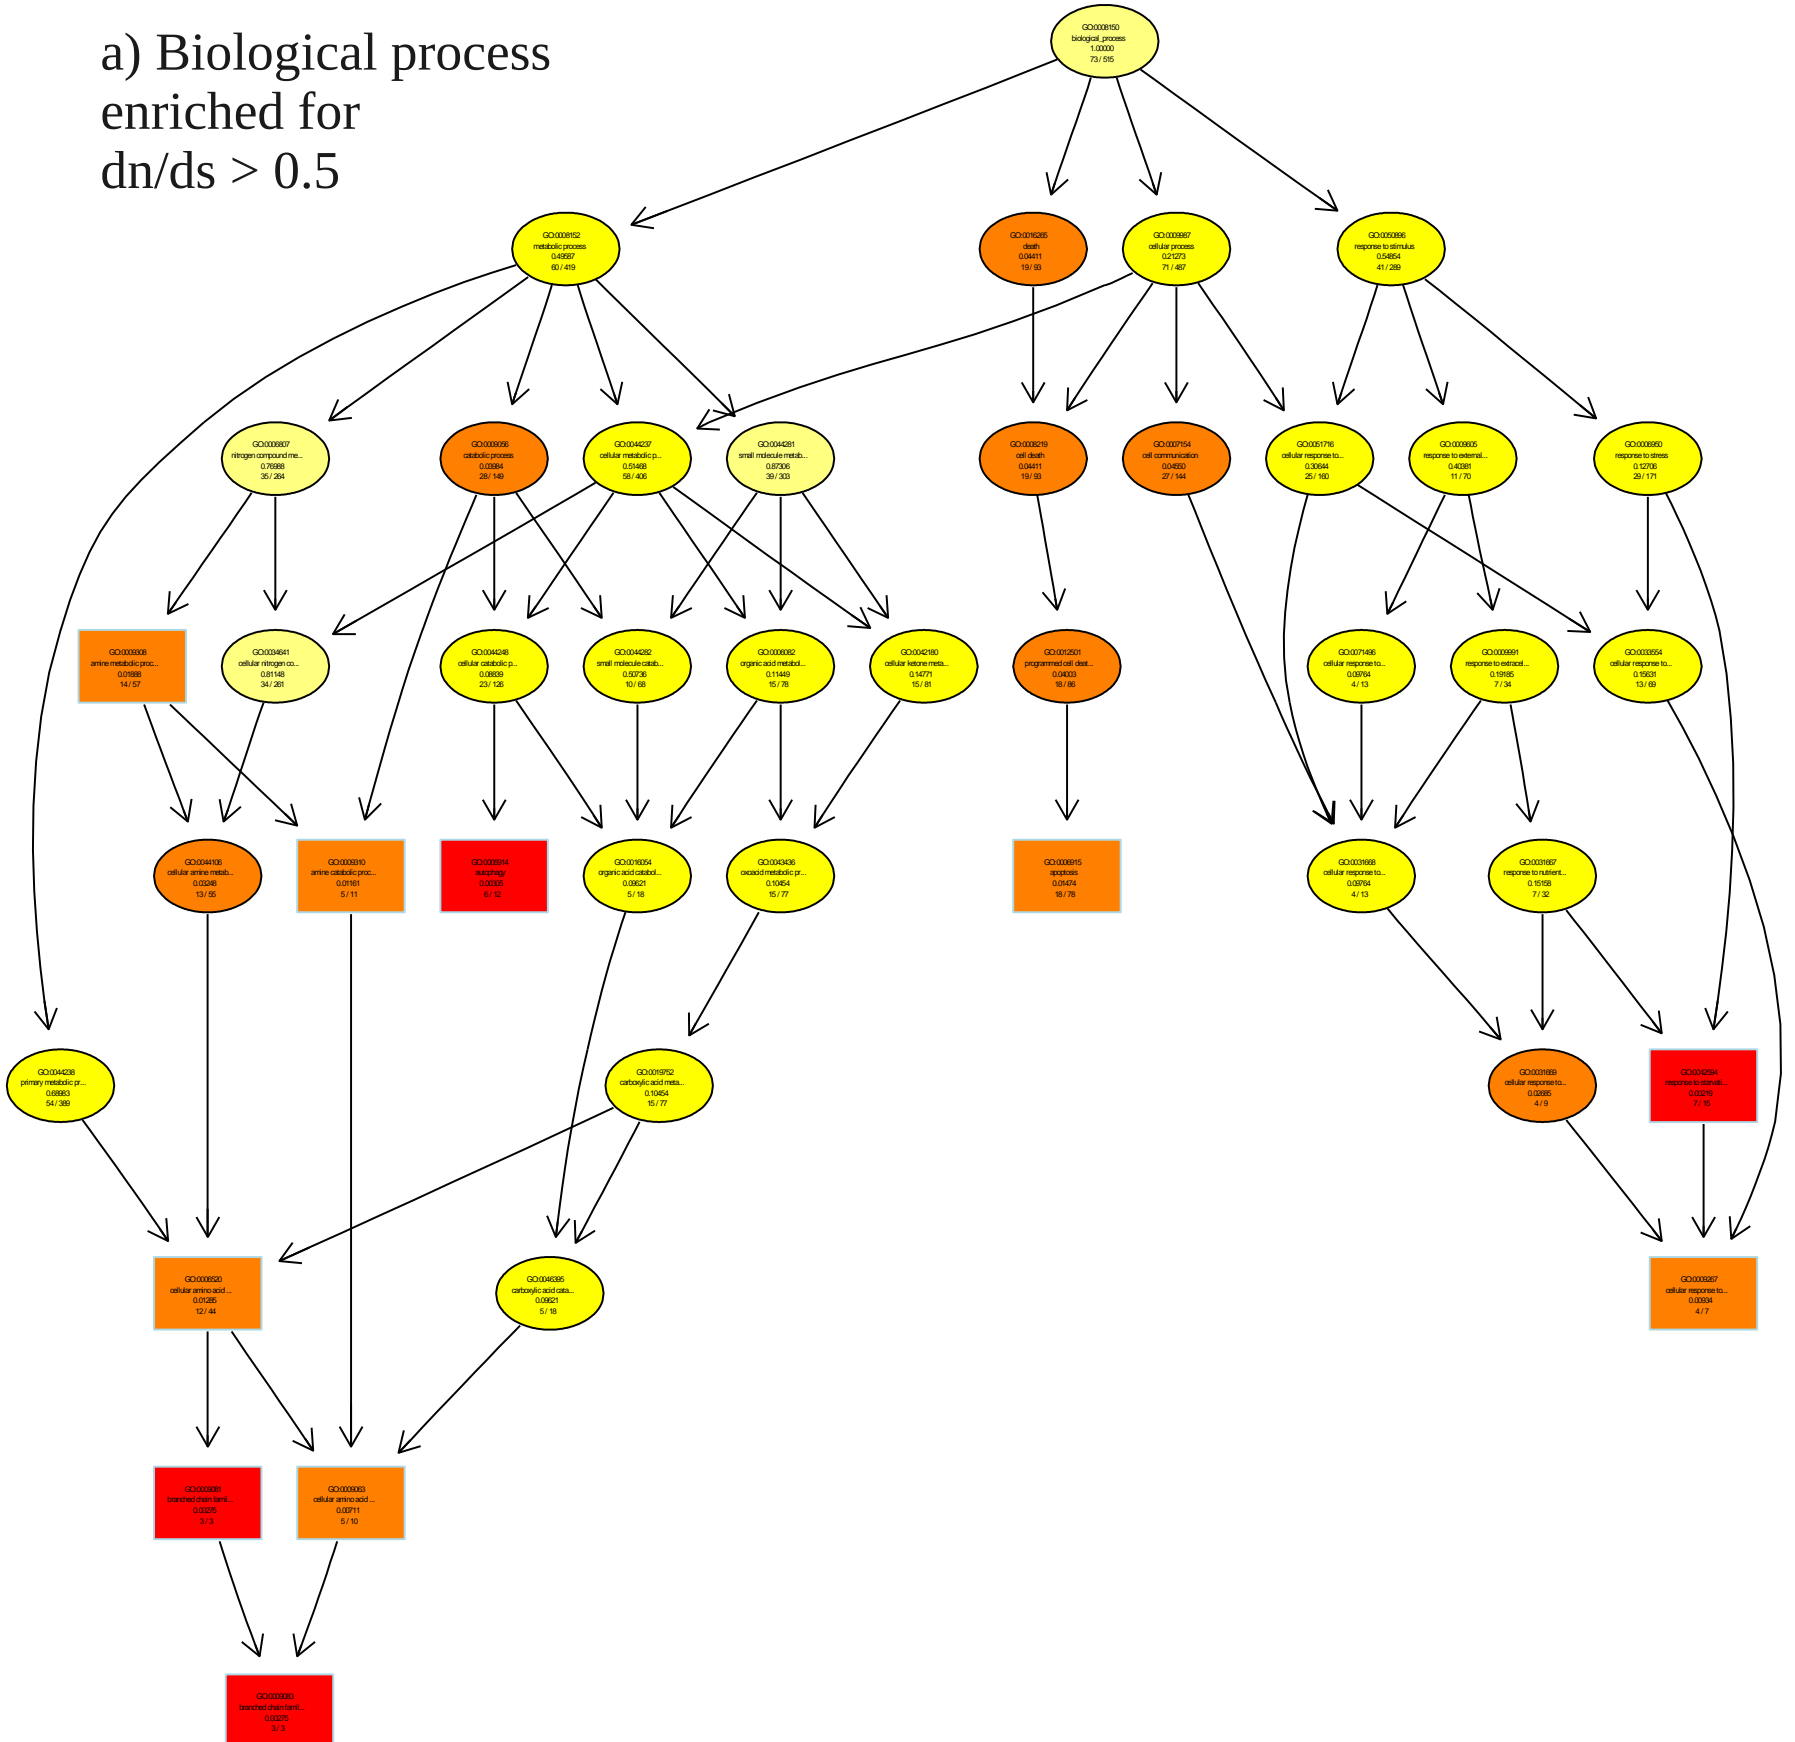

## b) Cellular compartment enriched for dn/ds > 0.5

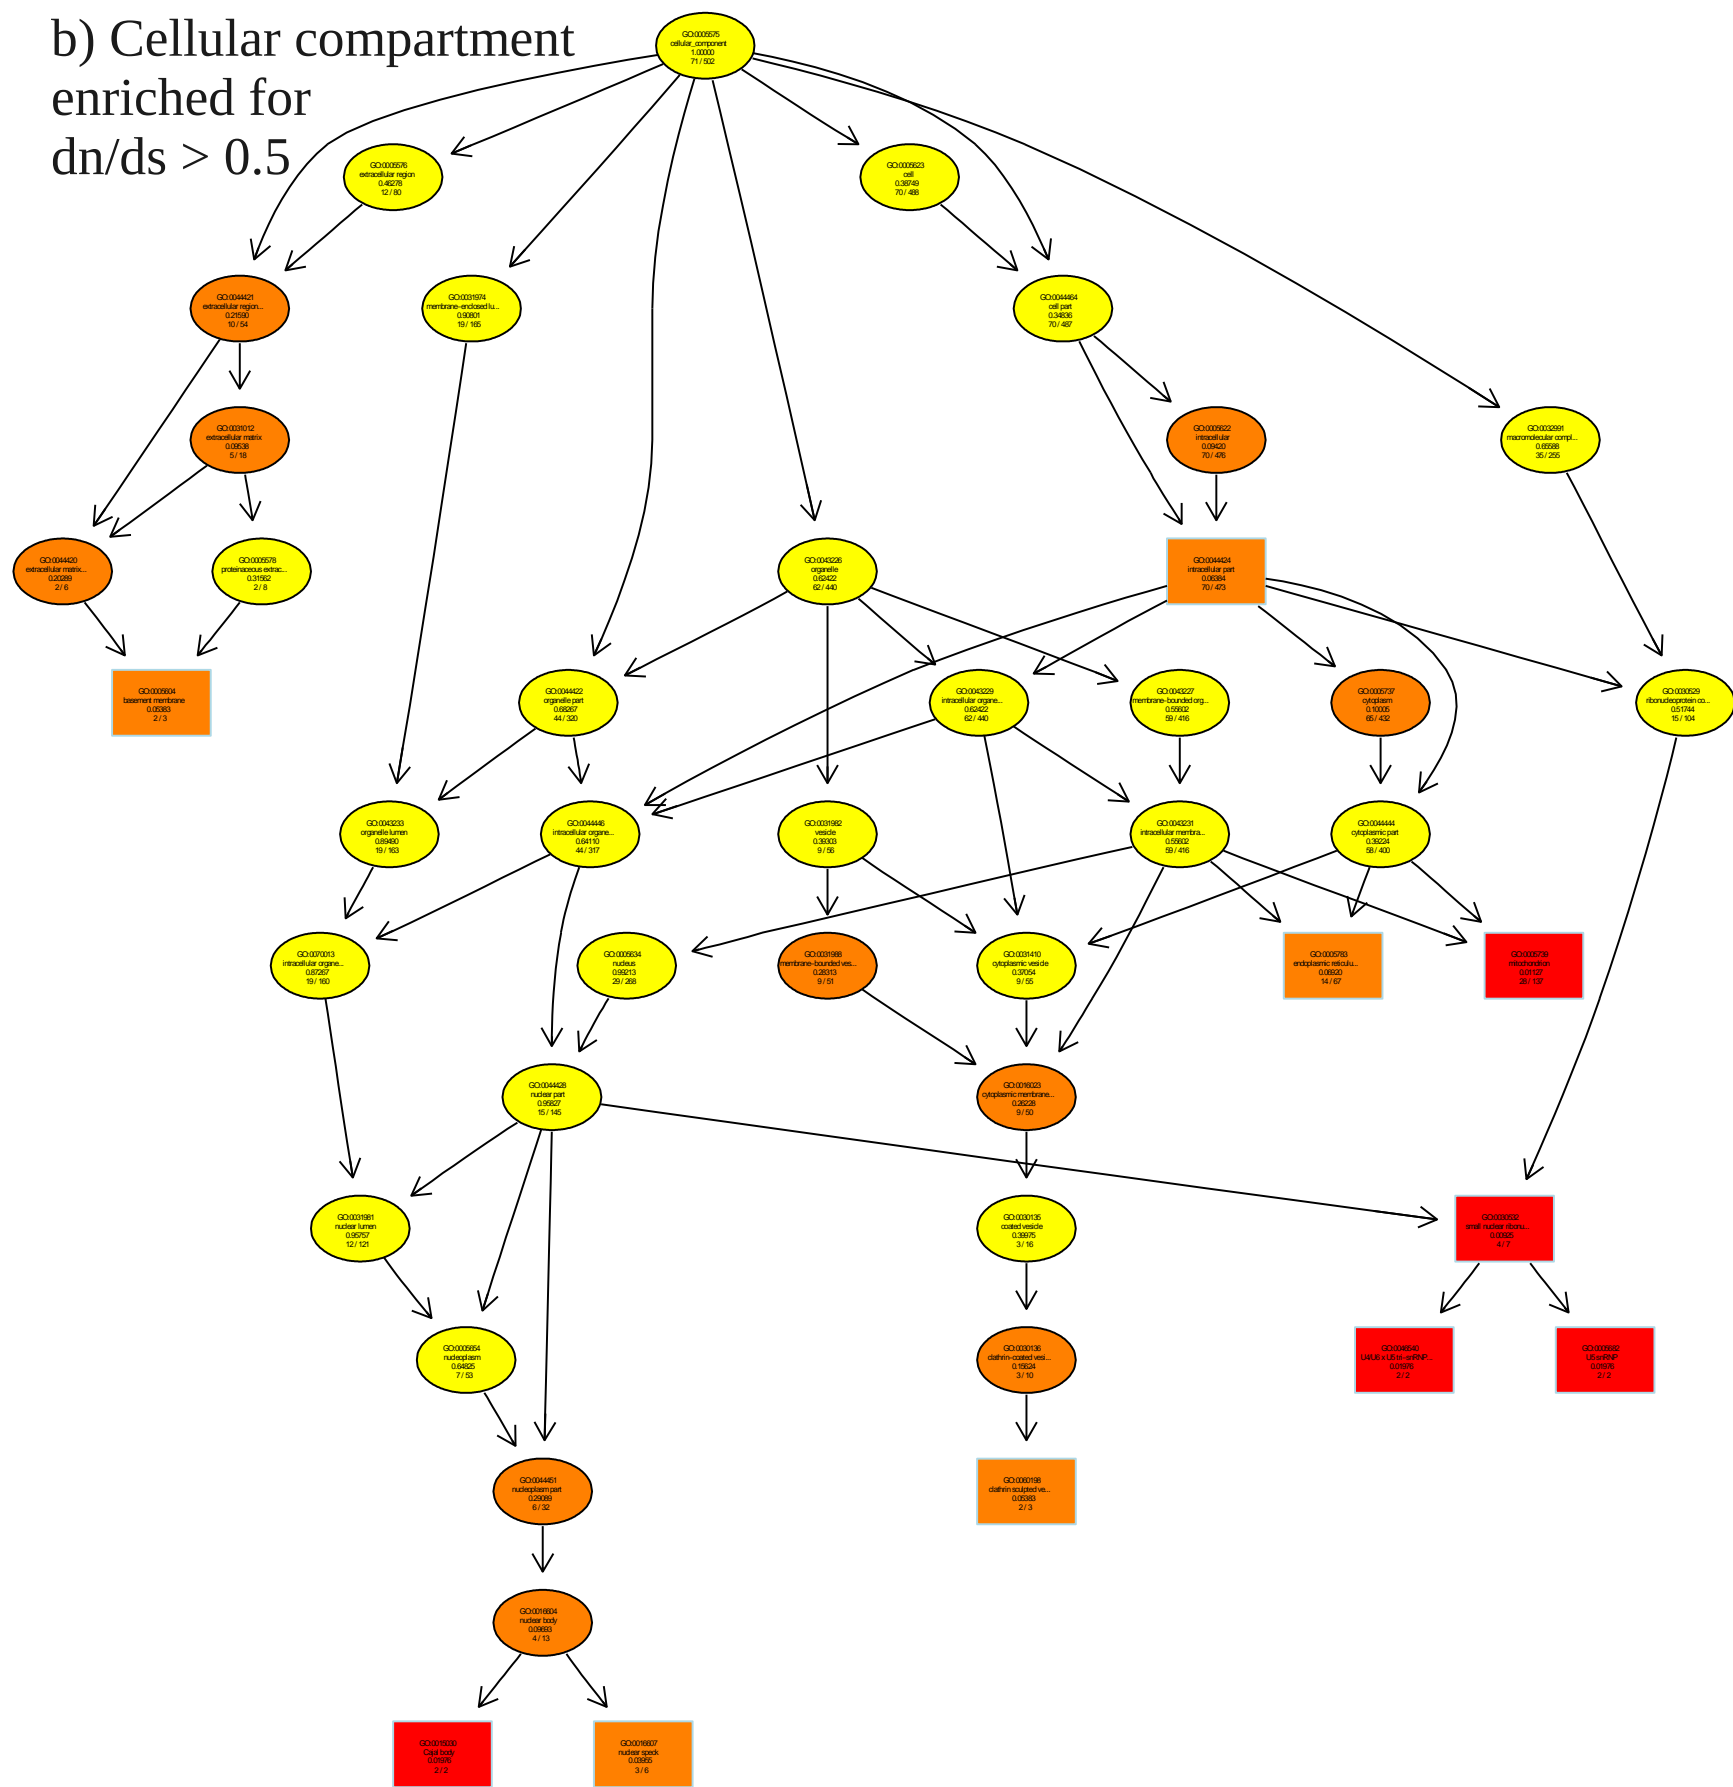

c) Molecular function  
enriched for  
 $dn/ds > 0.5$

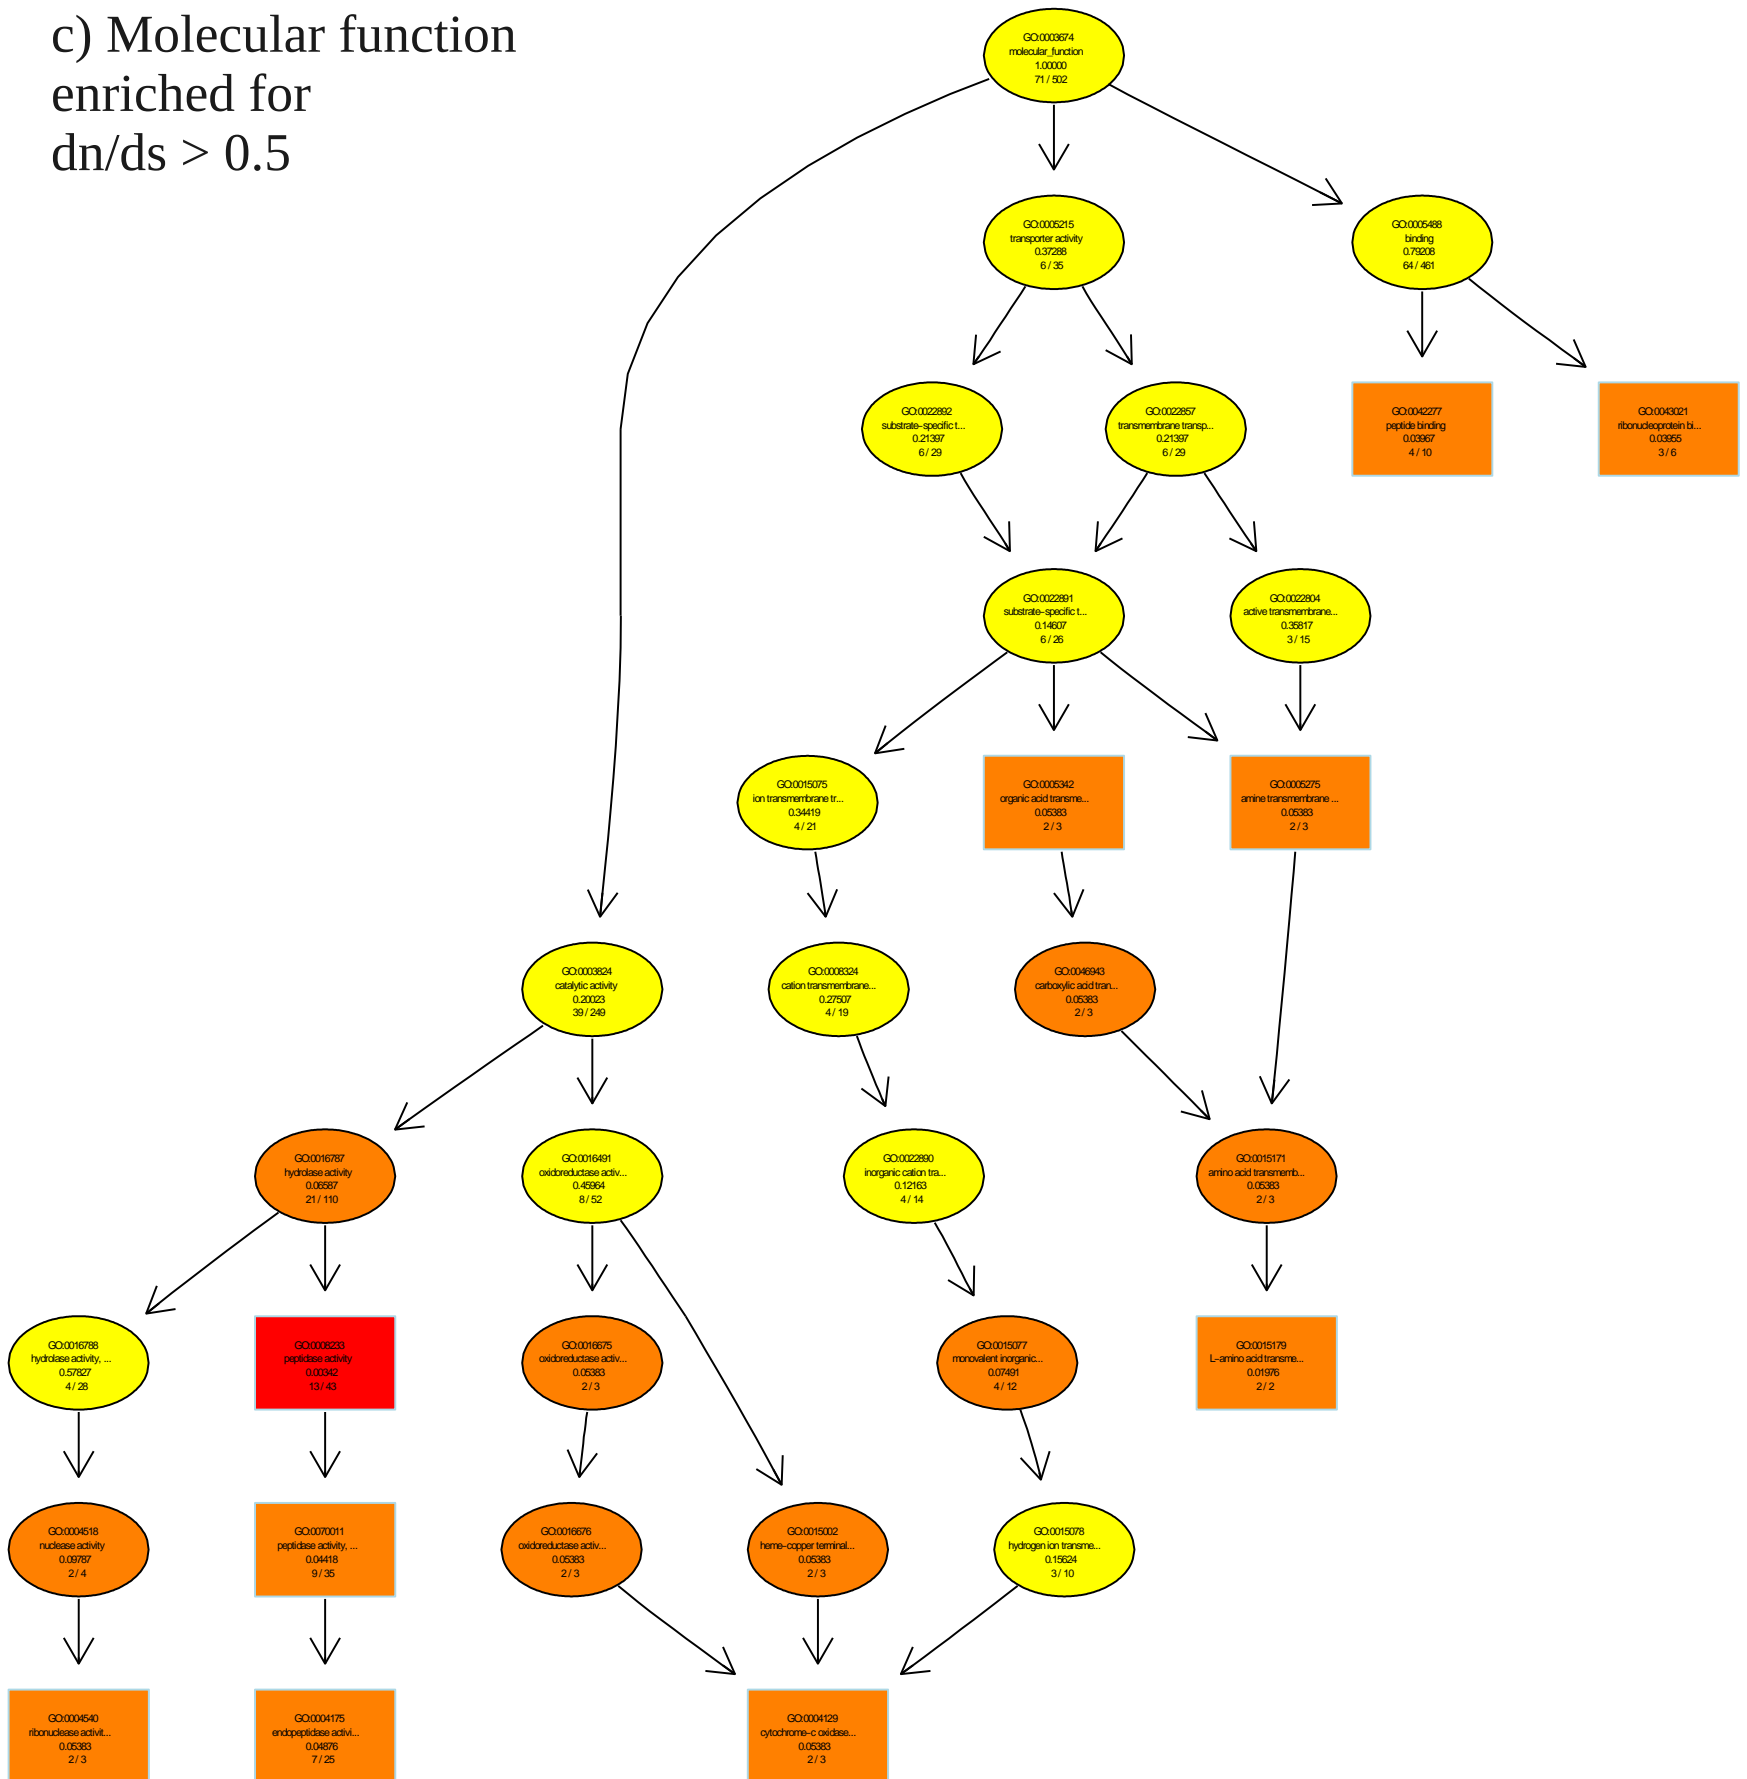

d) Biological process enriched for contigs differently expressed between Asia/Europe

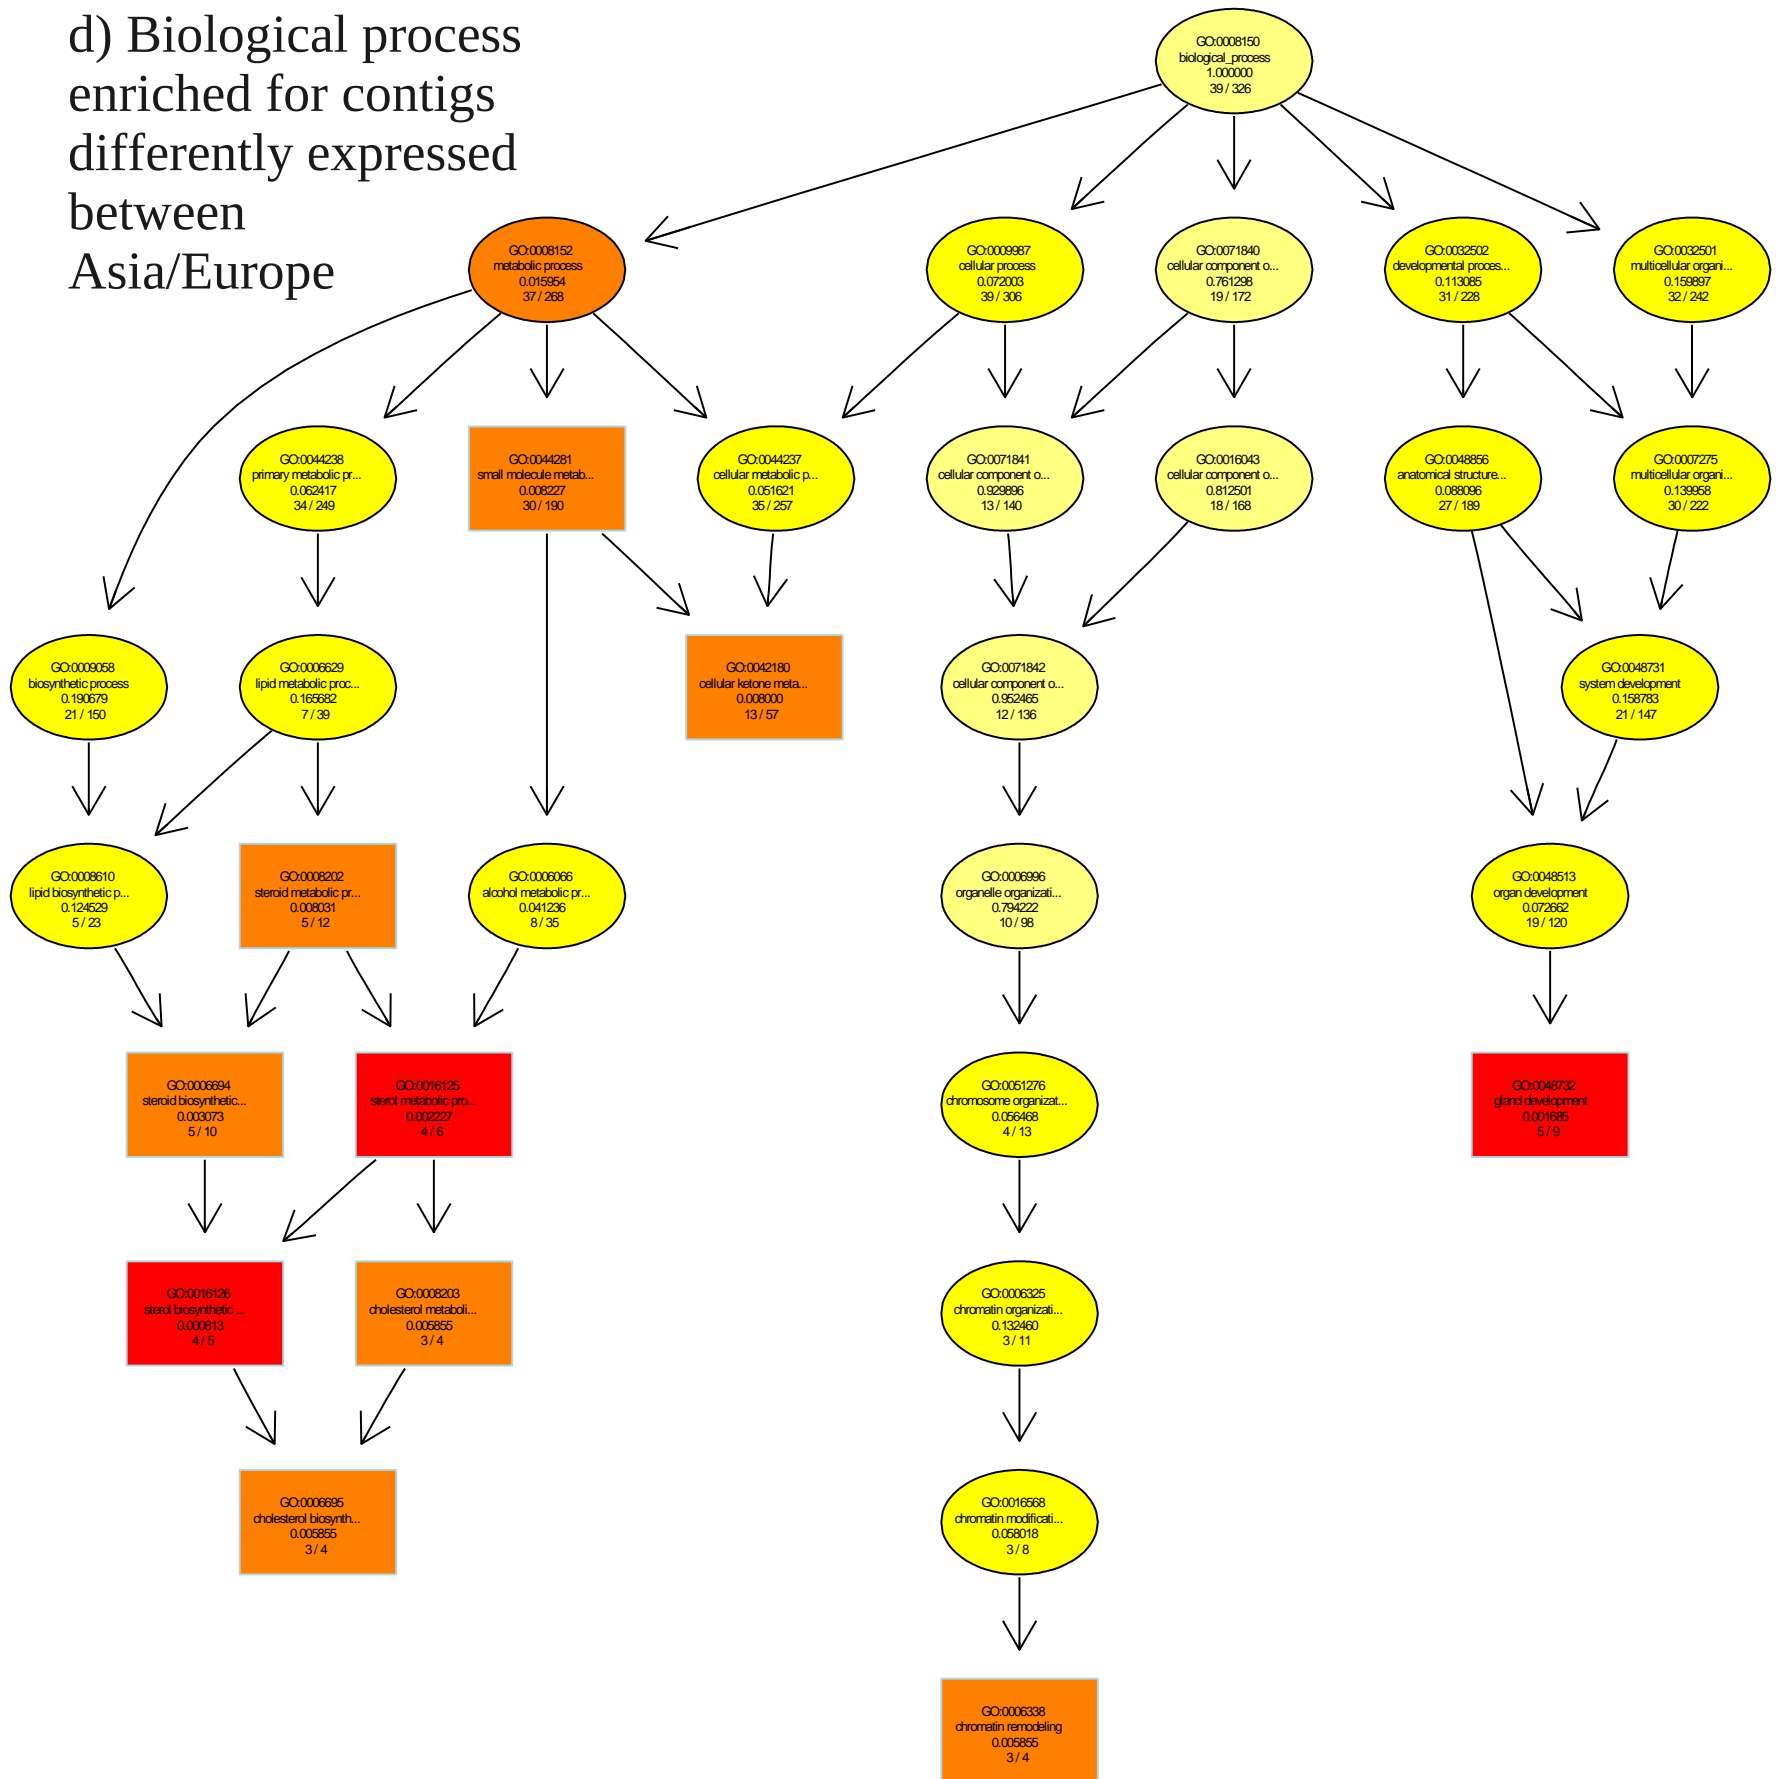

e) Cellular compartment enriched for contigs differently expressed between Asia/Europe

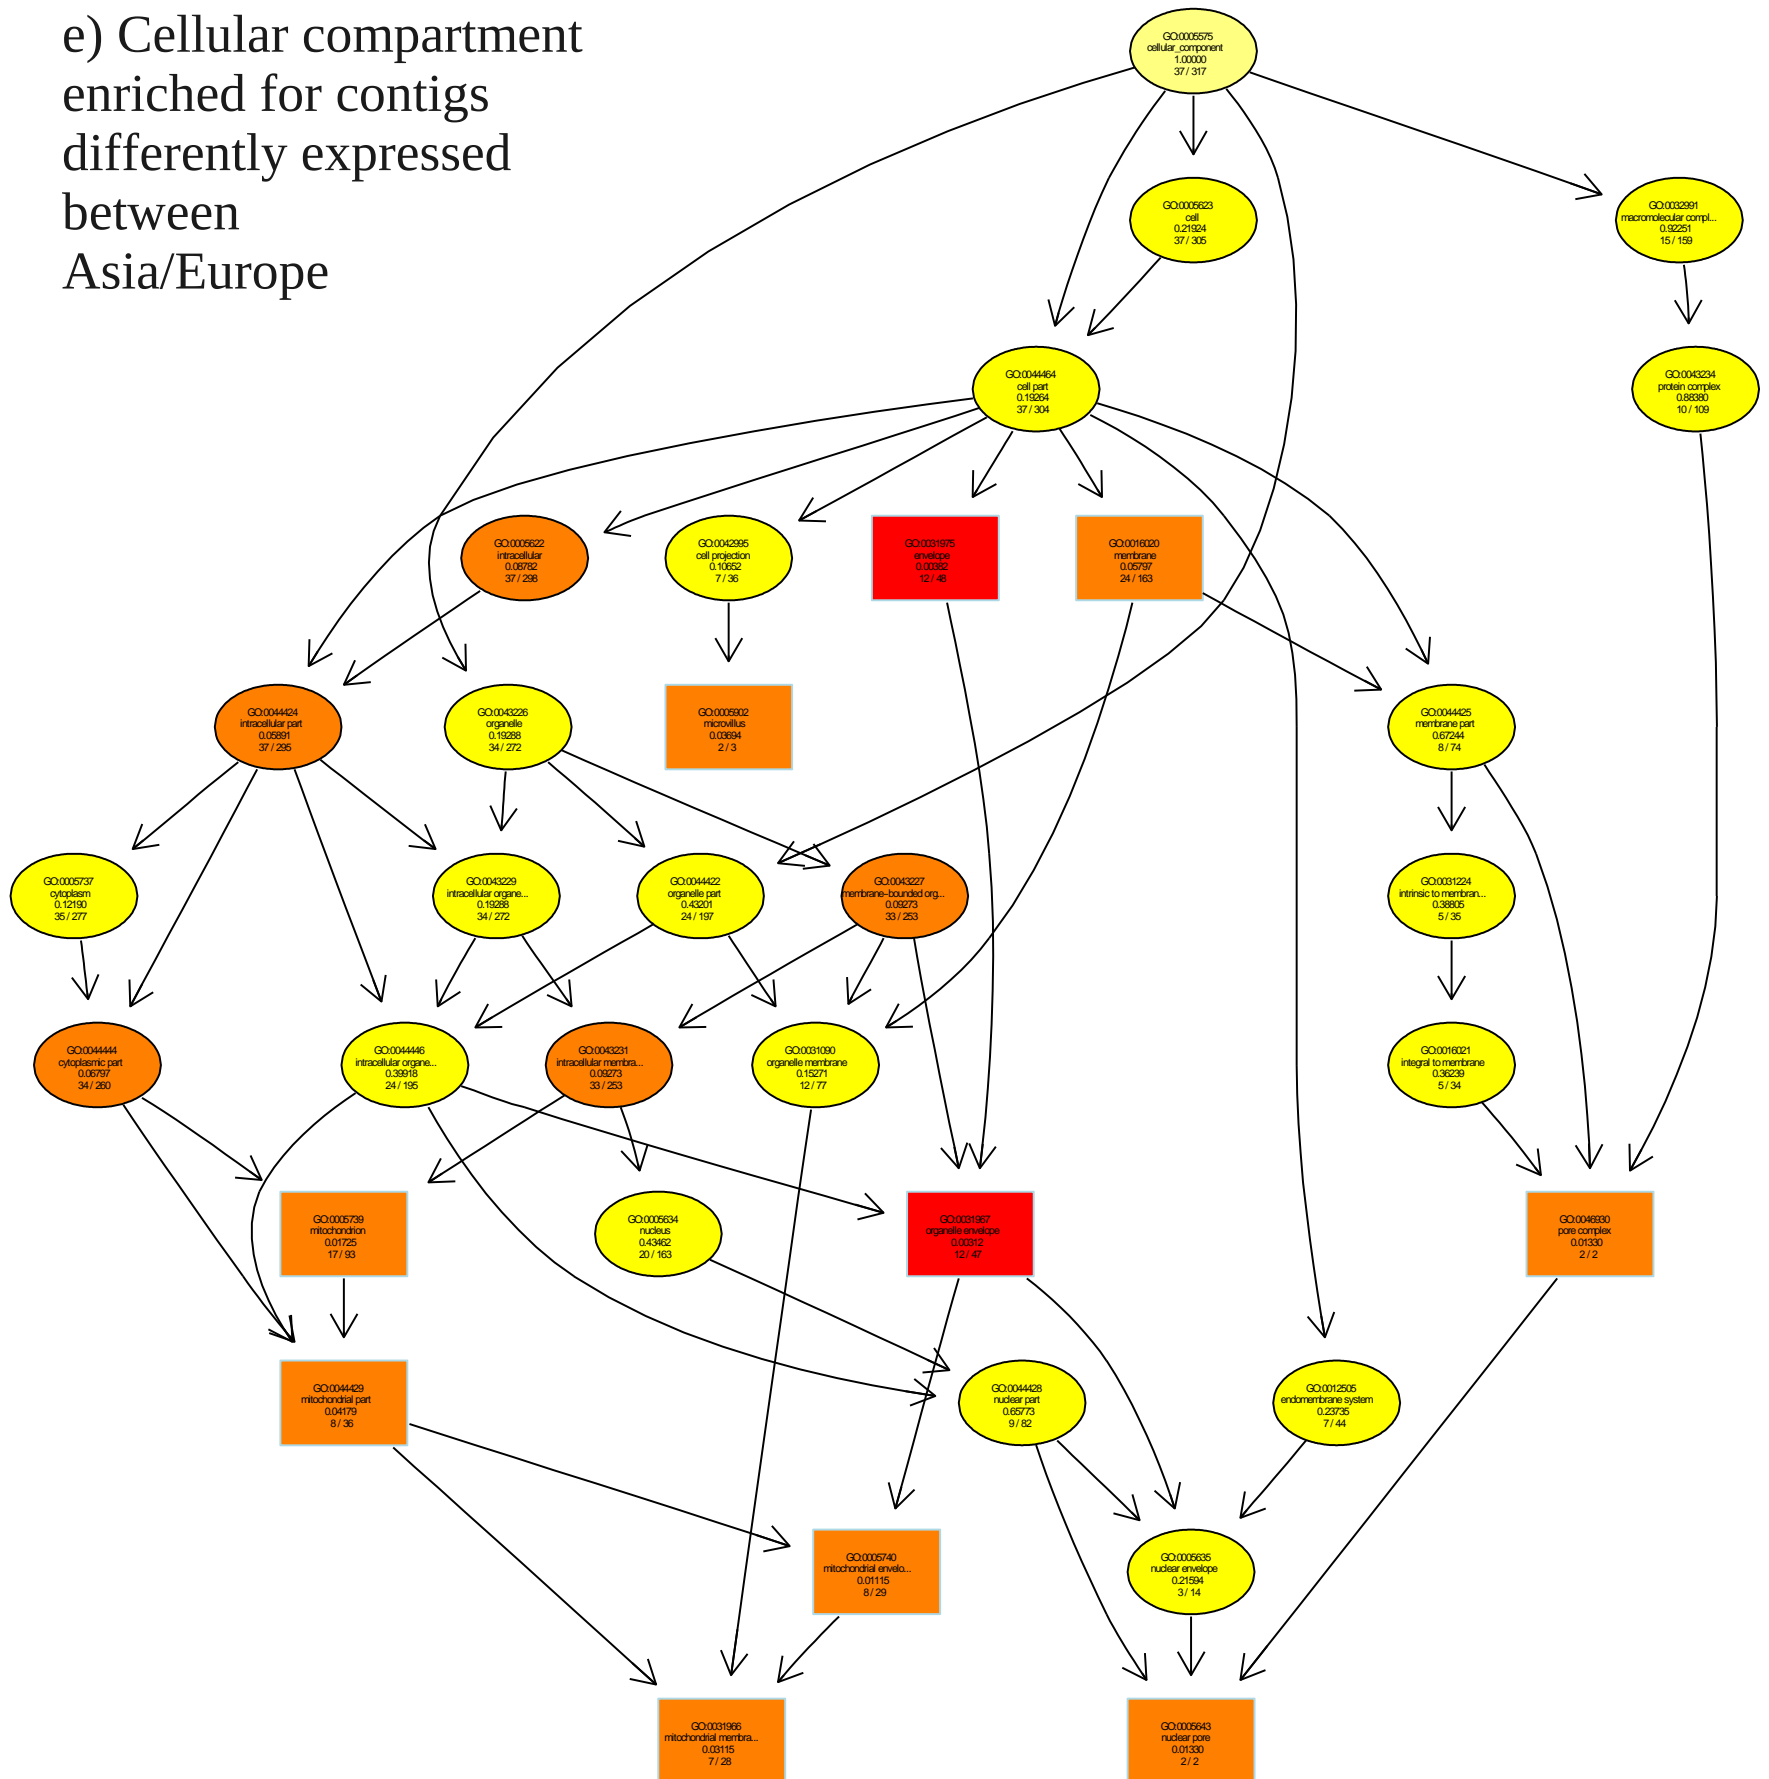

f) Molecular function enriched for contigs differently expressed between Asia/Europe

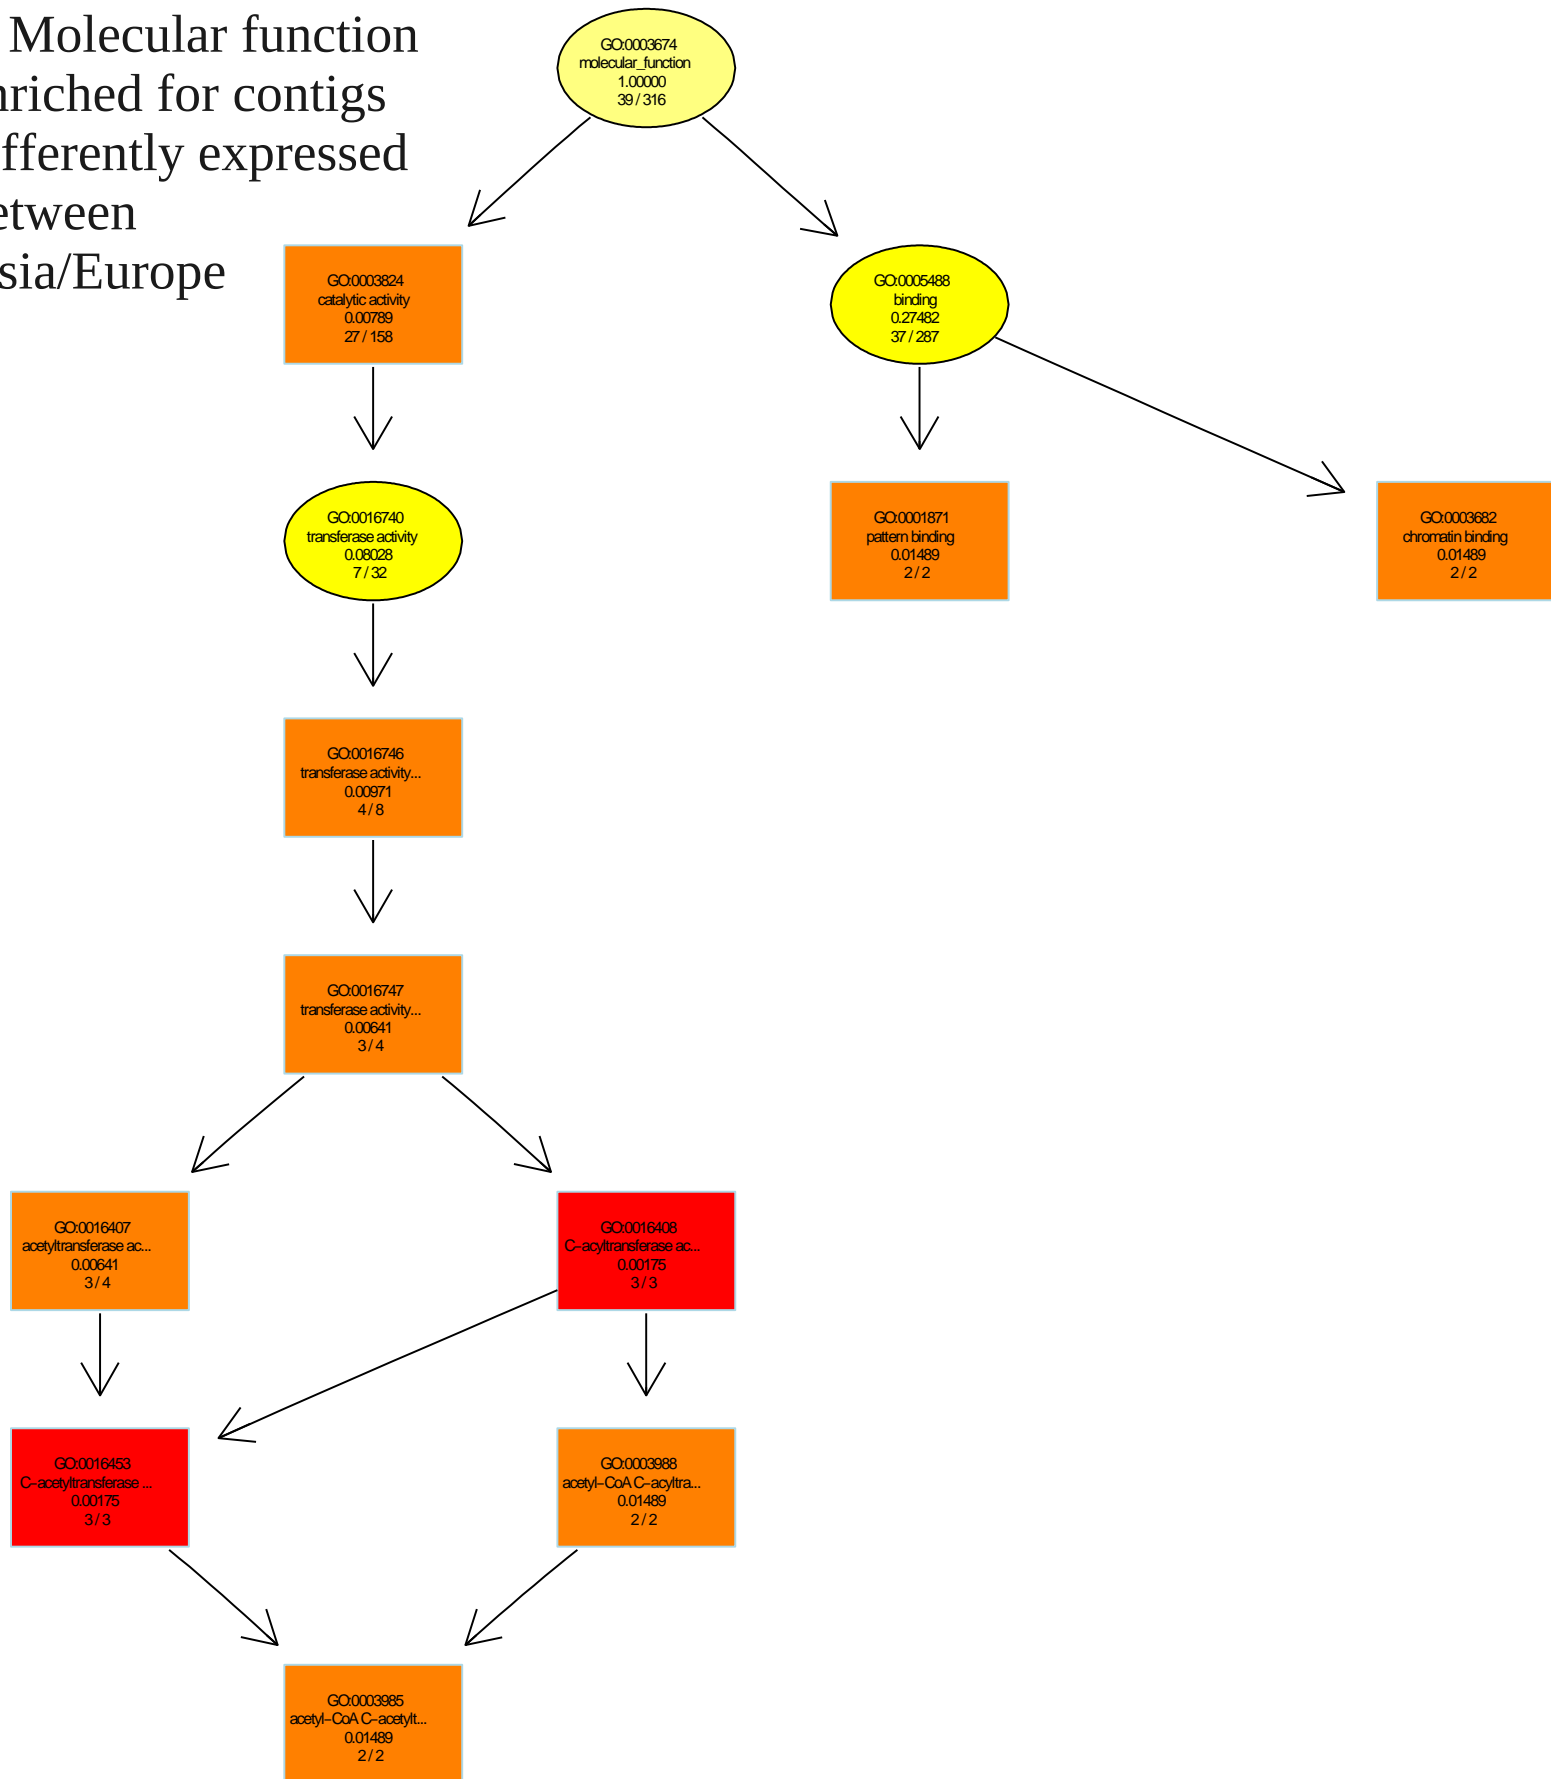

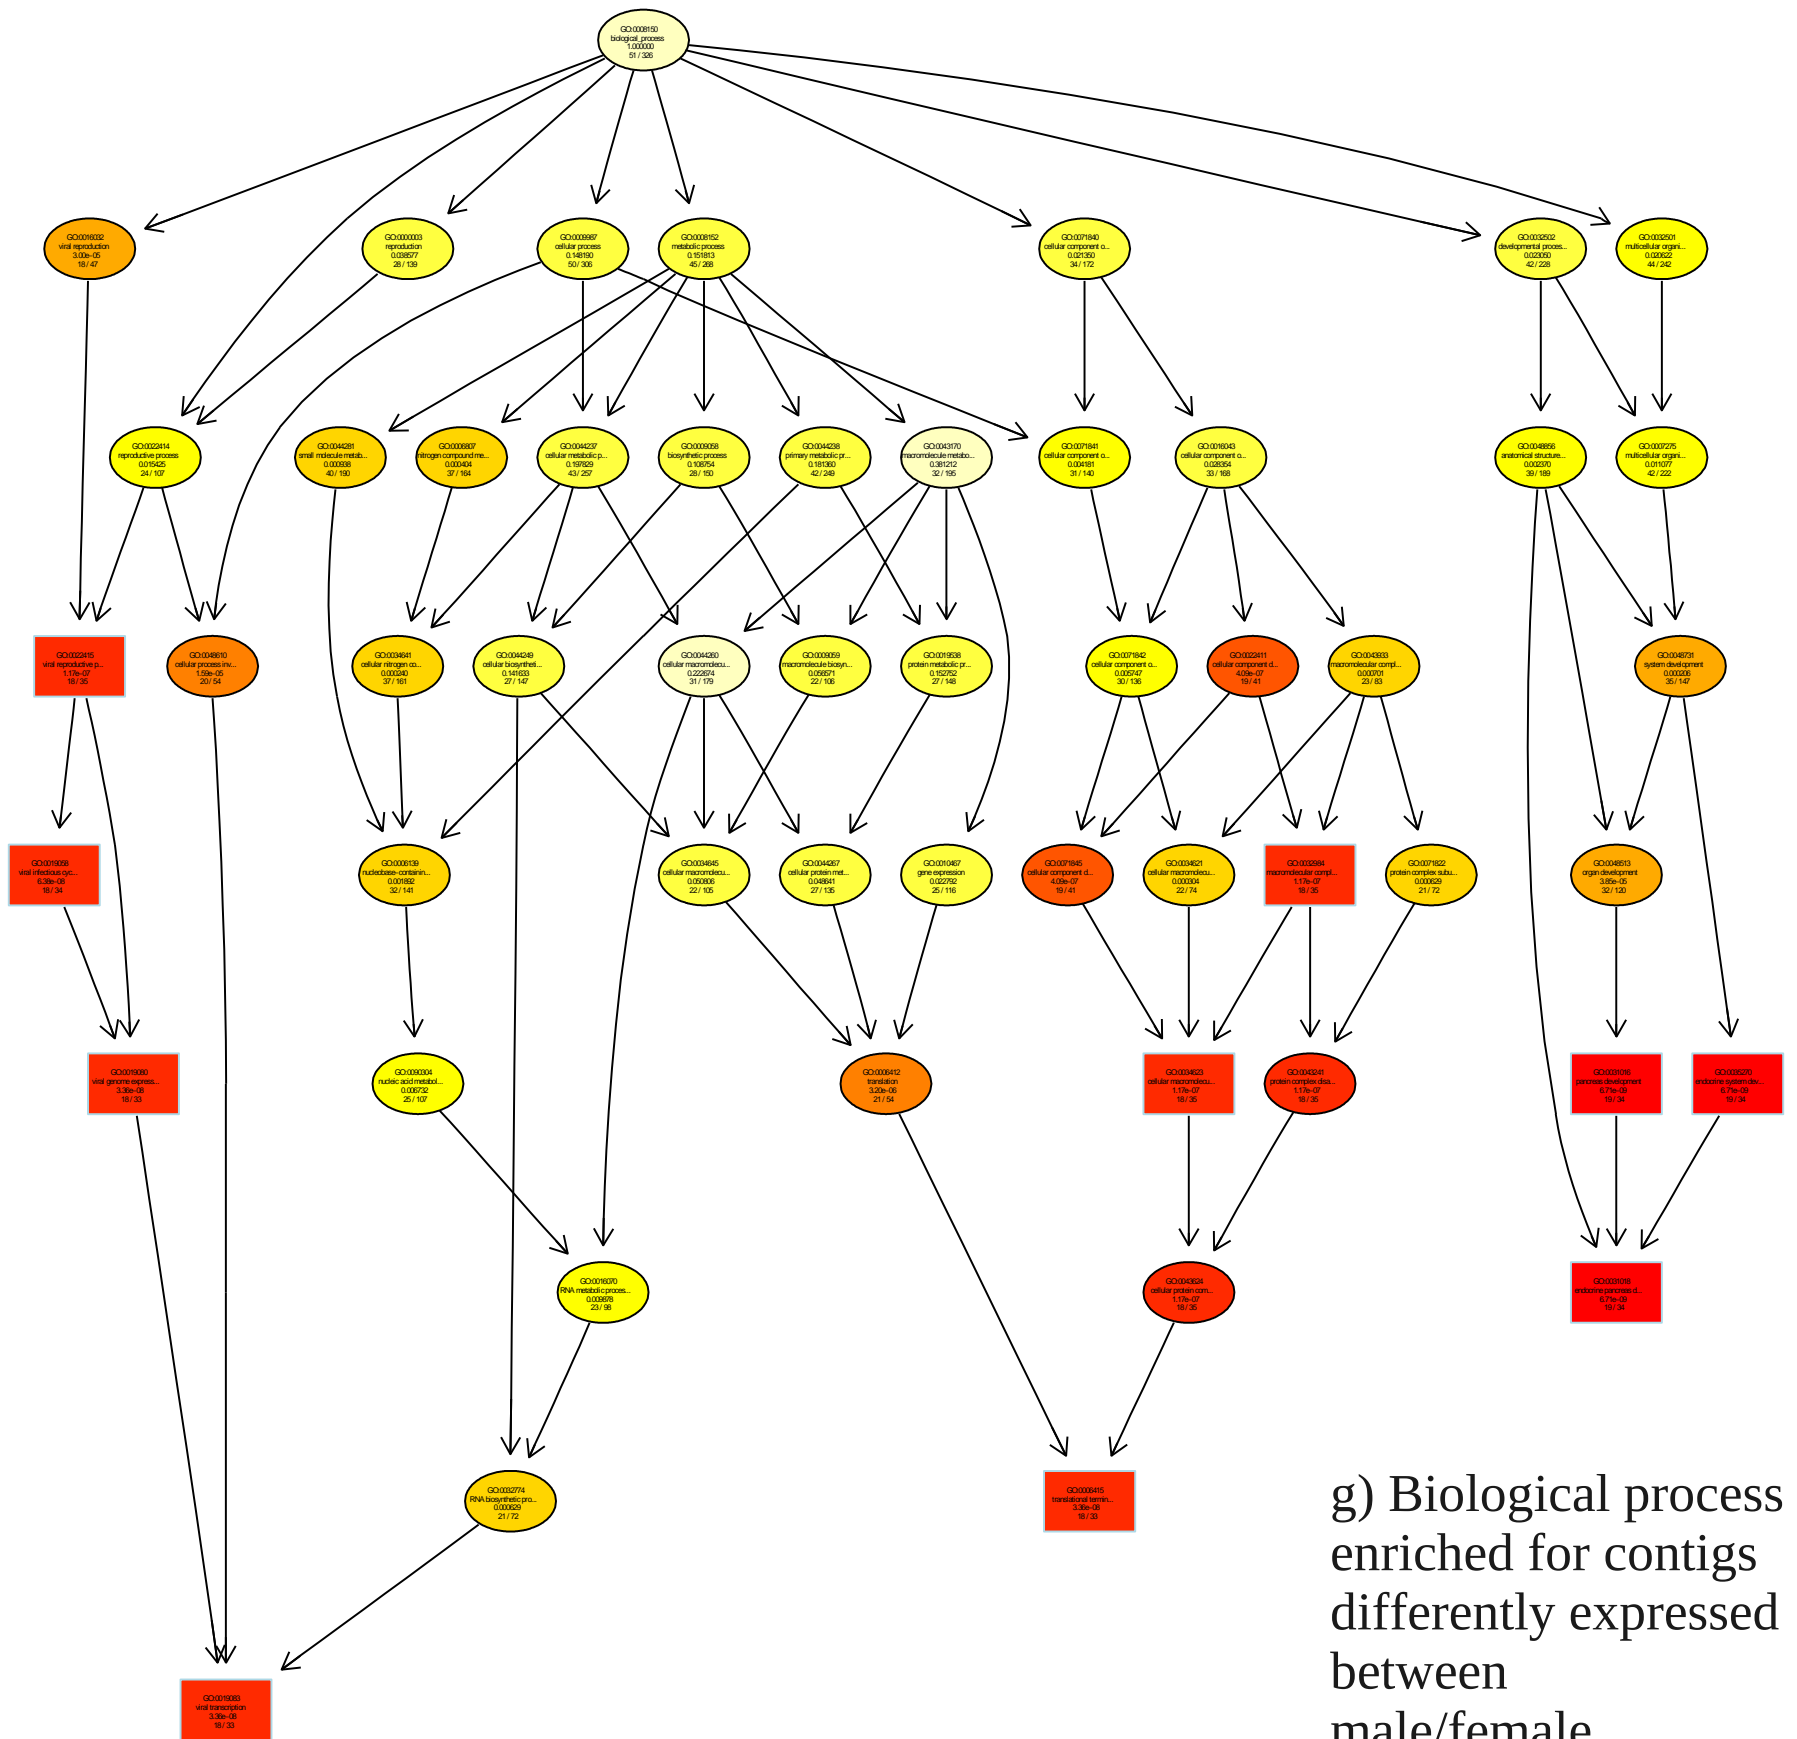

h) Cellular compartment enriched for contigs differently expressed between male/female

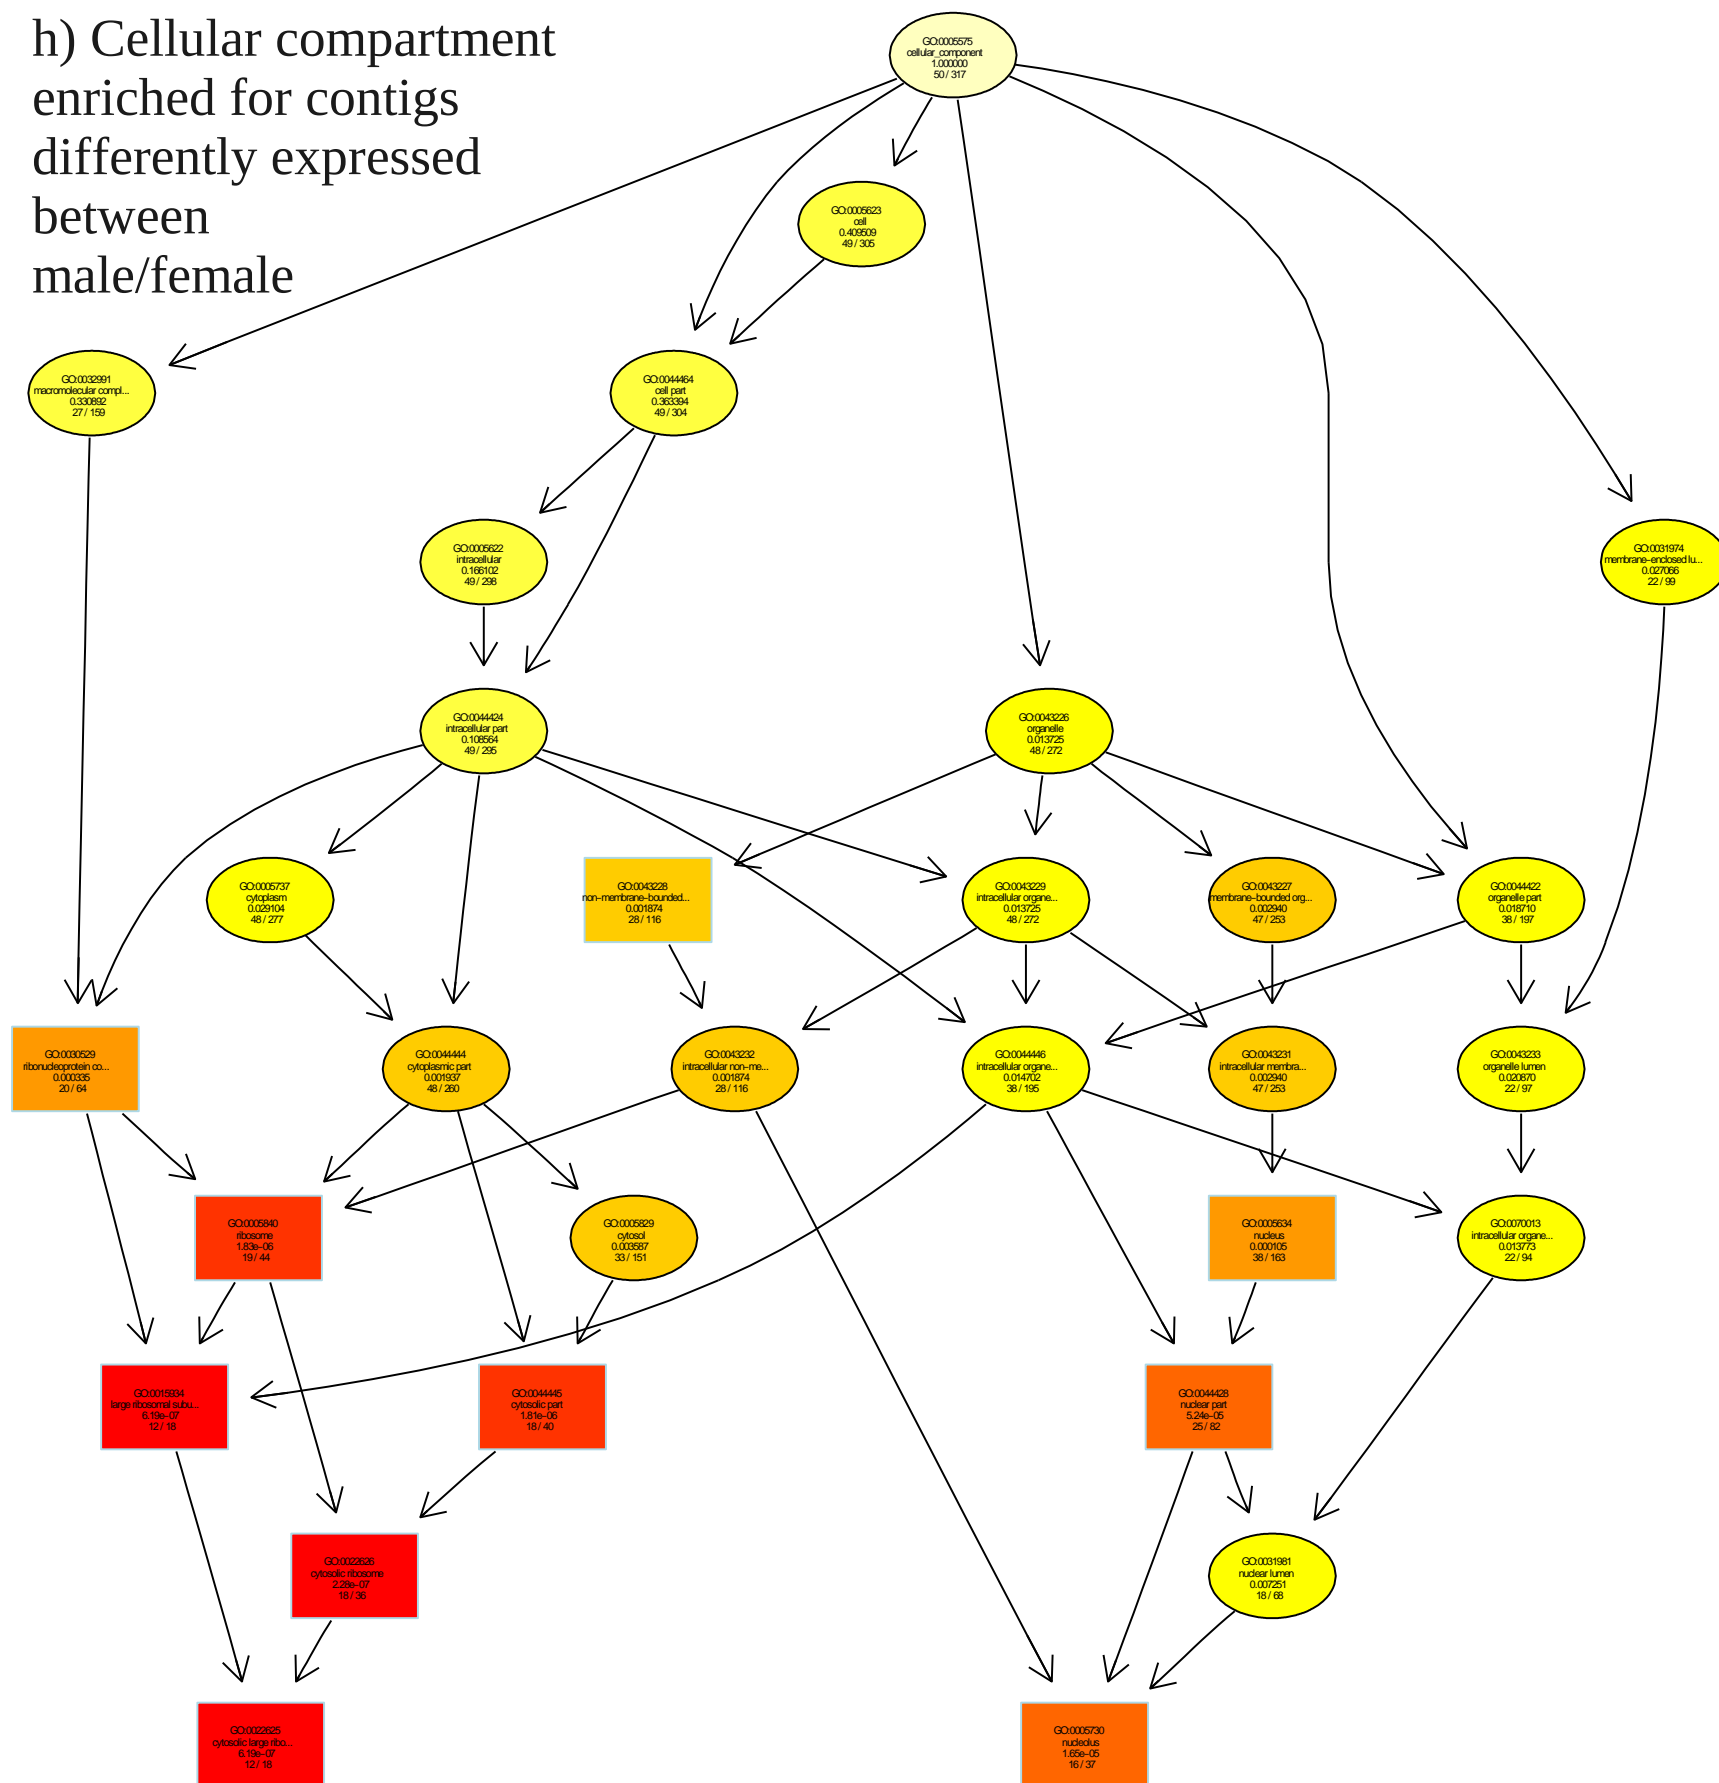



i) Molecular function enriched for contigs differently expressed between male/female

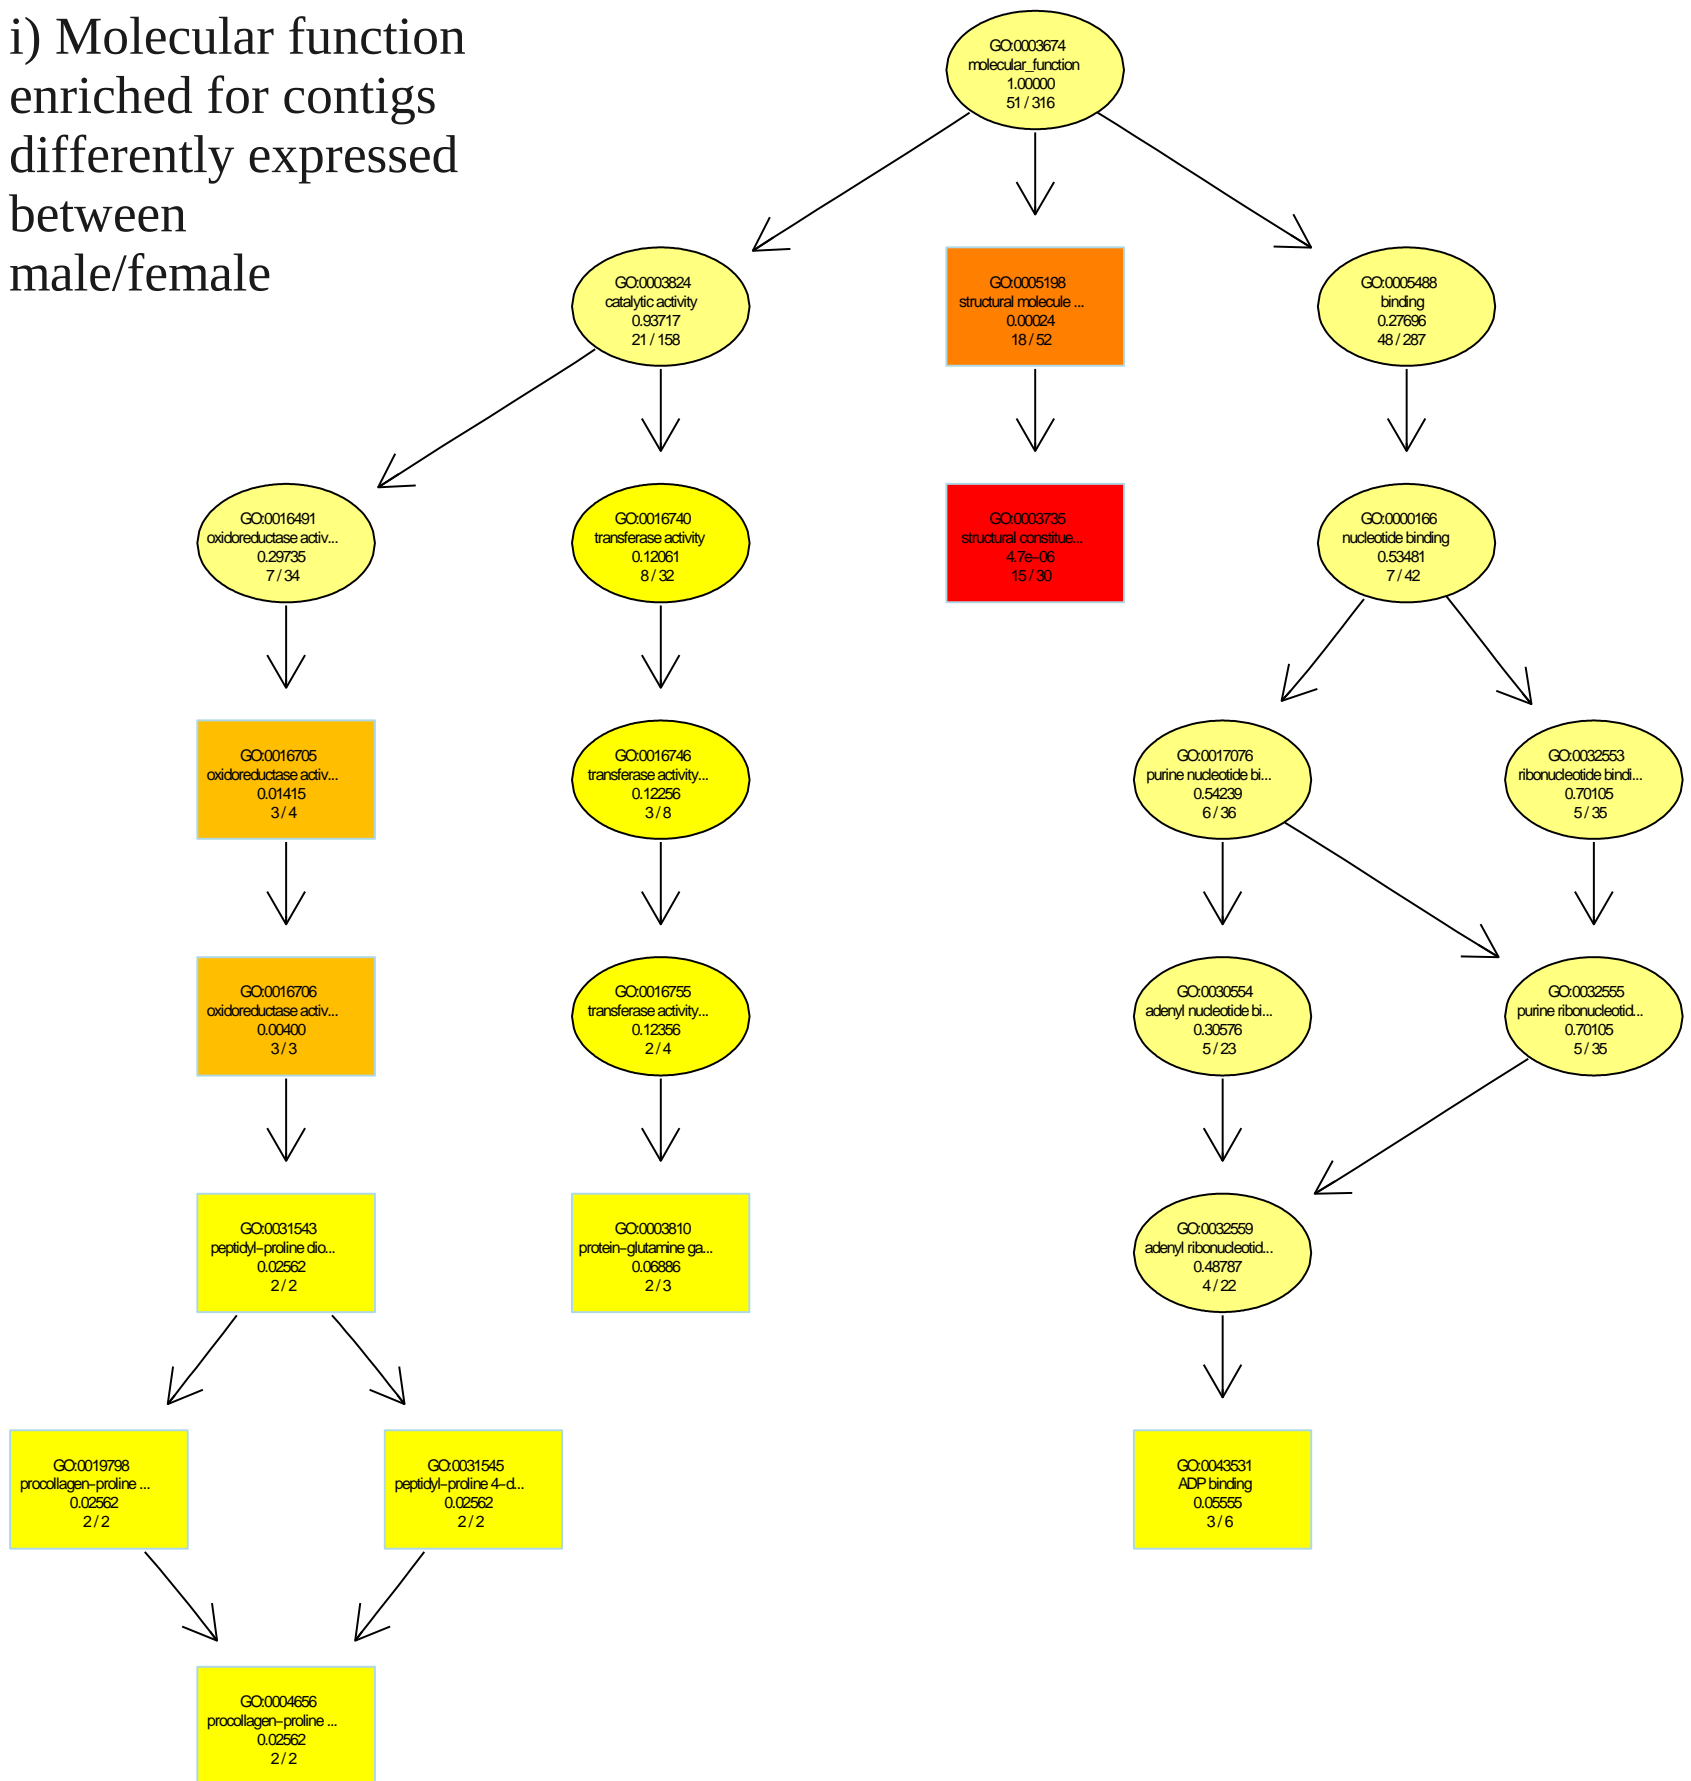

Supplement: 1471-2164-14-87-S5.pdf [file 1471-2164-14-87-S5.pdf]
